# Supplementary material
Source: Springer Nature journal article supplement (https://www.springermedizin.de/resource/supplementary/12943_2010_686_MOESM5_ESM.pdf/9554578)

**A****Total Cell Lysates**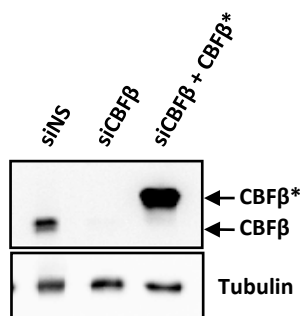**B****Invasion Assays**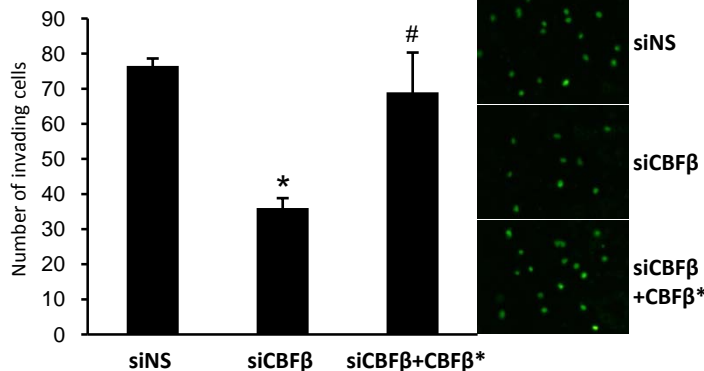**C****OPN mRNA**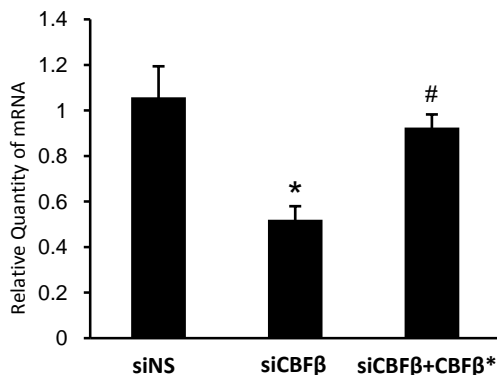**D****OPN Promoter Activity**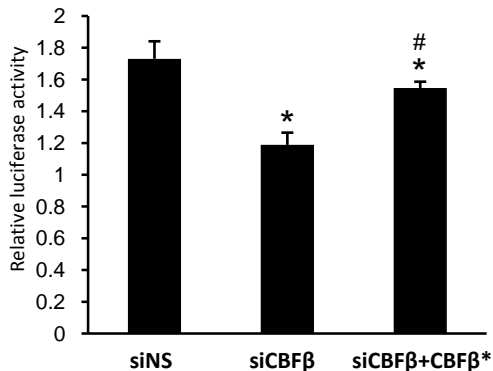**E****MMP13 mRNA**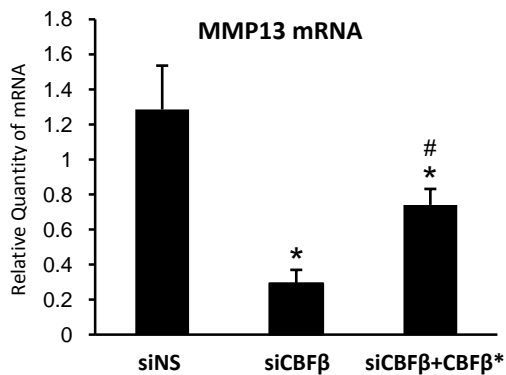**F****MMP13 Promoter Activity**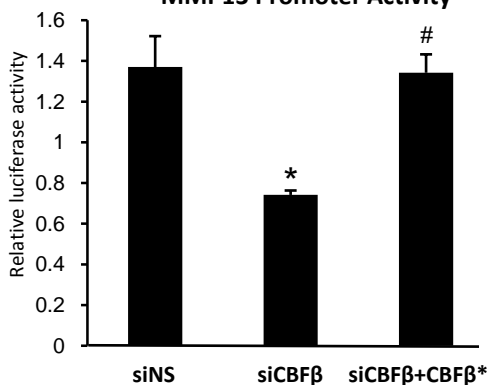

Supplement: MOESM5 [file 9554578]
